# Supplementary material for: Utilization of the fermentation residues of validamycin as a potential platform for seed treatment
Source: Royal Society of Chemistry journal article supplement (doi:10.1039/c7ra12298e), 2018-01-01
Supplement: c7ra12298e1.pdf [file c7ra12298e1.pdf]

## Supporting information

### **Utilization of fermentation residues of validamycin as a potential platform for seed treatment**

Bo Zhang, Shaowei Liao and Tianrui Ren\*

The Key Laboratory of Resource Chemistry of Ministry of Education, The Development Centre of Plant Germplasm Resources, College of Life and Environmental Science, Shanghai Normal University, 100 Guilin Road, Shanghai, 200234, P. R. China

\* Corresponding author: Prof. Tianrui Ren

Phone: +86 21 64328850; Fax: +86 21 64328850

E-mail address: [trren@shnu.edu.cn](mailto:trren@shnu.edu.cn)

**Table S1.** Physicochemical property analysis of TEB-VFR/SD-816/NNO FS

| Sample                  | Suspension rate (%) | Viscosity (mPa.s) | pH   | Film-forming effect | Coating uniformity (%) | Abscission rate (%) | Thermal stability (%) | Cold storage stability (%) |
|-------------------------|---------------------|-------------------|------|---------------------|------------------------|---------------------|-----------------------|----------------------------|
| TEB-VFR/SD-816/NNO      | 96.4                | 670               | 6.26 | Good                | 95                     | 5.8                 | 93.8                  | 93.2                       |
| Standard <sup>1,2</sup> | >90                 | 300-800           | 5 ~7 | Good                | >90                    | <10                 | >90                   | >90                        |

**References**

1 Shenyang Research Institute of Chemical Industry. The methods of pesticide suspension: GB/T 14825-2006. Beijing: China Standard Press, 2006. (In Chinese)

2 Institute for the Control of Agrochemicals, Ministry of Agriculture. Guidelines on drafting standards of suspension concentrates for seed dressing: GB/T 17768-1999. Beijing: China Standard Press, 1999. (In Chinese)
